# Supplementary material for: Absence of mgrB Alleviates Negative Growth Effects of Colistin Resistance in Enterobacter cloacae
Source: MDPI journal article supplement (doi:10.3390/antibiotics9110825), 2020-11-19
Supplement: s1 [file s1]

**Table S1.** Broth Microdilution of Mu471, Mu471 *PmgrB*, ATCC13047, ATCC13047 $\Delta mgrB$ .

| Strain Name             | MIC (Colistin)        |
|-------------------------|-----------------------|
| Mu471                   | >200 $\mu\text{g/mL}$ |
| Mu471 <i>PmgrB</i>      | 0.78 $\mu\text{g/mL}$ |
| ATCC13047               | >200 $\mu\text{g/mL}$ |
| ATCC13047 $\Delta mgrB$ | >200 $\mu\text{g/mL}$ |
