# Supplementary figures and images for: Absence of mgrB Alleviates Negative Growth Effects of Colistin Resistance in Enterobacter cloacae
Source: MDPI journal article supplement (doi:10.3390/antibiotics9110825), 2020-11-19

Mu471

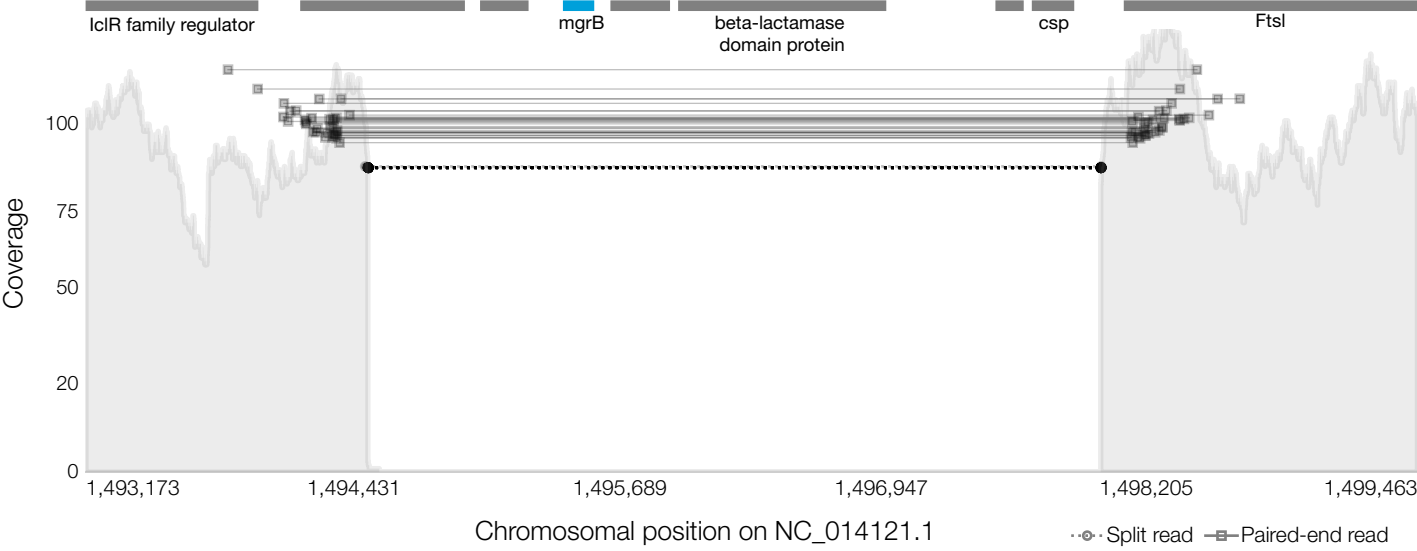

Supplement: s1 [file s1]
